# Supplementary material
Source: publisher figshare collection journal article supplement (https://tandf.figshare.com/ndownloader/files/13507478)
Supplement: Supplementary file 1 [file 13507478]

**Supplementary materials**

**Title:**

**Responses of Active Ammonia Oxidizers to** **Eutrophication and** **Oxygen Statuses in Taihu Freshwater Sediments**

**Authors:**

Ling Wu1,2,4, Cheng Han1, 4, Hongyi Qin1, 4, Guangwei Zhu3, Wenhui Zhong1, 4,*

Number of Supplementary Tables: 2

Number of Supplementary Figures: 3

**Table S1** **Primers and conditions used in this study**

| **Primer name** | **Primer sequence (5’-3’)** | **Targeting gene** | **Thermal profile for PCR** | **Molecular analysis** | **Reference** |
| --- | --- | --- | --- | --- | --- |
| Arch-amoAF  Arch-amoAR | STA ATG GTC TGG CTT AGA CG  GCG GCC ATC CAT CTG TAT GT | AOA *amoA* gene | 95℃, 3.0min; 35×(95℃, 30s; 55℃, 30s; 72℃, 45s with plate read); Melt curve 65.0℃ to 95.0℃, increment 0.5℃, 0:05+ plate read | Real-time qPCR  in Fig. 2 and Fig. 3 | Francis et al, 2005 |
| amoA-1F  amoA-2R | GGG GTT TCT ACT GGT GGT  CCC CTC KGS AAA GCC TTC TTC | AOB *amoA* gene | 95℃, 3.0min; 35×(95℃, 30s; 55℃, 30s; 72℃, 30s with plate read); Melt curve 65.0℃ to 95.0℃, increment 0.5℃, 0:05s+ plate read | Rotthauwe et al., 1997 |
| 515F  907R | GTG CCA GCM GCC GCG GTA A  CCG TCA ATT CCT TTR AGT TT | *16S rRNA* gene | 94℃, 3.0 min; 30×(95℃ 30s; 55℃ 30s; 72℃ 30s); 72℃ 6min; hold at 4°C | PCR for Miseq pyrosequncing  in Fig. 4 and 5, Fig. S2 and S3 | Lane 1991, Stubner 2002 |
| Arch-amoAF  Arch-amoAR | STA ATG GTC TGG CTT AGA CG  GCG GCC ATC CAT CTG TAT GT | AOA *amoA* gene | 94℃,5.0 min; 35×(95℃ 30s; 55℃ 45 s; 72℃ 45s); 72℃ 7 min; hold at 4°C | PCR for 454 pyrosequncing  in Fig. 4 and 5, Fig. S2 and S3 | Francis et al, 2005 |
| amoA-1F  amoA-2R | GGG GTT TCT ACT GGT GGT  CCC CTC KGS AAA GCC TTC TTC | AOB *amoA* gene | 94℃,5.0 min; 35×(94℃ 30s; 55℃ 30s; 72℃ 45s); 72℃ 8 min; hold at 4°C | Rotthauwe et al., 1997 |

**Table S2 Net nitrification rates and net *amoA* gene growing rates in meso-E-SOS、meso-E-AOS、light-E-SOS and light-E-AOS**

**sediment microcosms incubated with 13CO2 for 56 days.**

| Sample No. | Net nitrification rate  μg N g-1 *d.w.s* d-1 | Net archaeal *amoA* gene growing rate×107  g-1 *d.w.s* d-1 | Net bacterial *amoA* gene growing rate×106  g-1 *d.w.s* d-1 |
| --- | --- | --- | --- |
| Day-56-13CO2 | Day-56-13CO2 | Day-56-13CO2 |
| meso-E-SOS | 13.5±0.20a† | 13.2±2.66ab | 16.0±4.70a |
| meso-E-AOS | 11.6±0.10b | 1.39±0.09c | －10.9±3.65b |
| light-E-SOS | 11.8±0.21b | 14.7±0.26a | 5.81±5.95ab |
| light-E-AOS | 12.3±0.07b | 6.07±1.69bc | 13.0±2.77a |

**†****Values are means ± standard deviation (*n* = 3). Different letters in a column indicate a significant different using ANOVA (*P* < 0.05).**


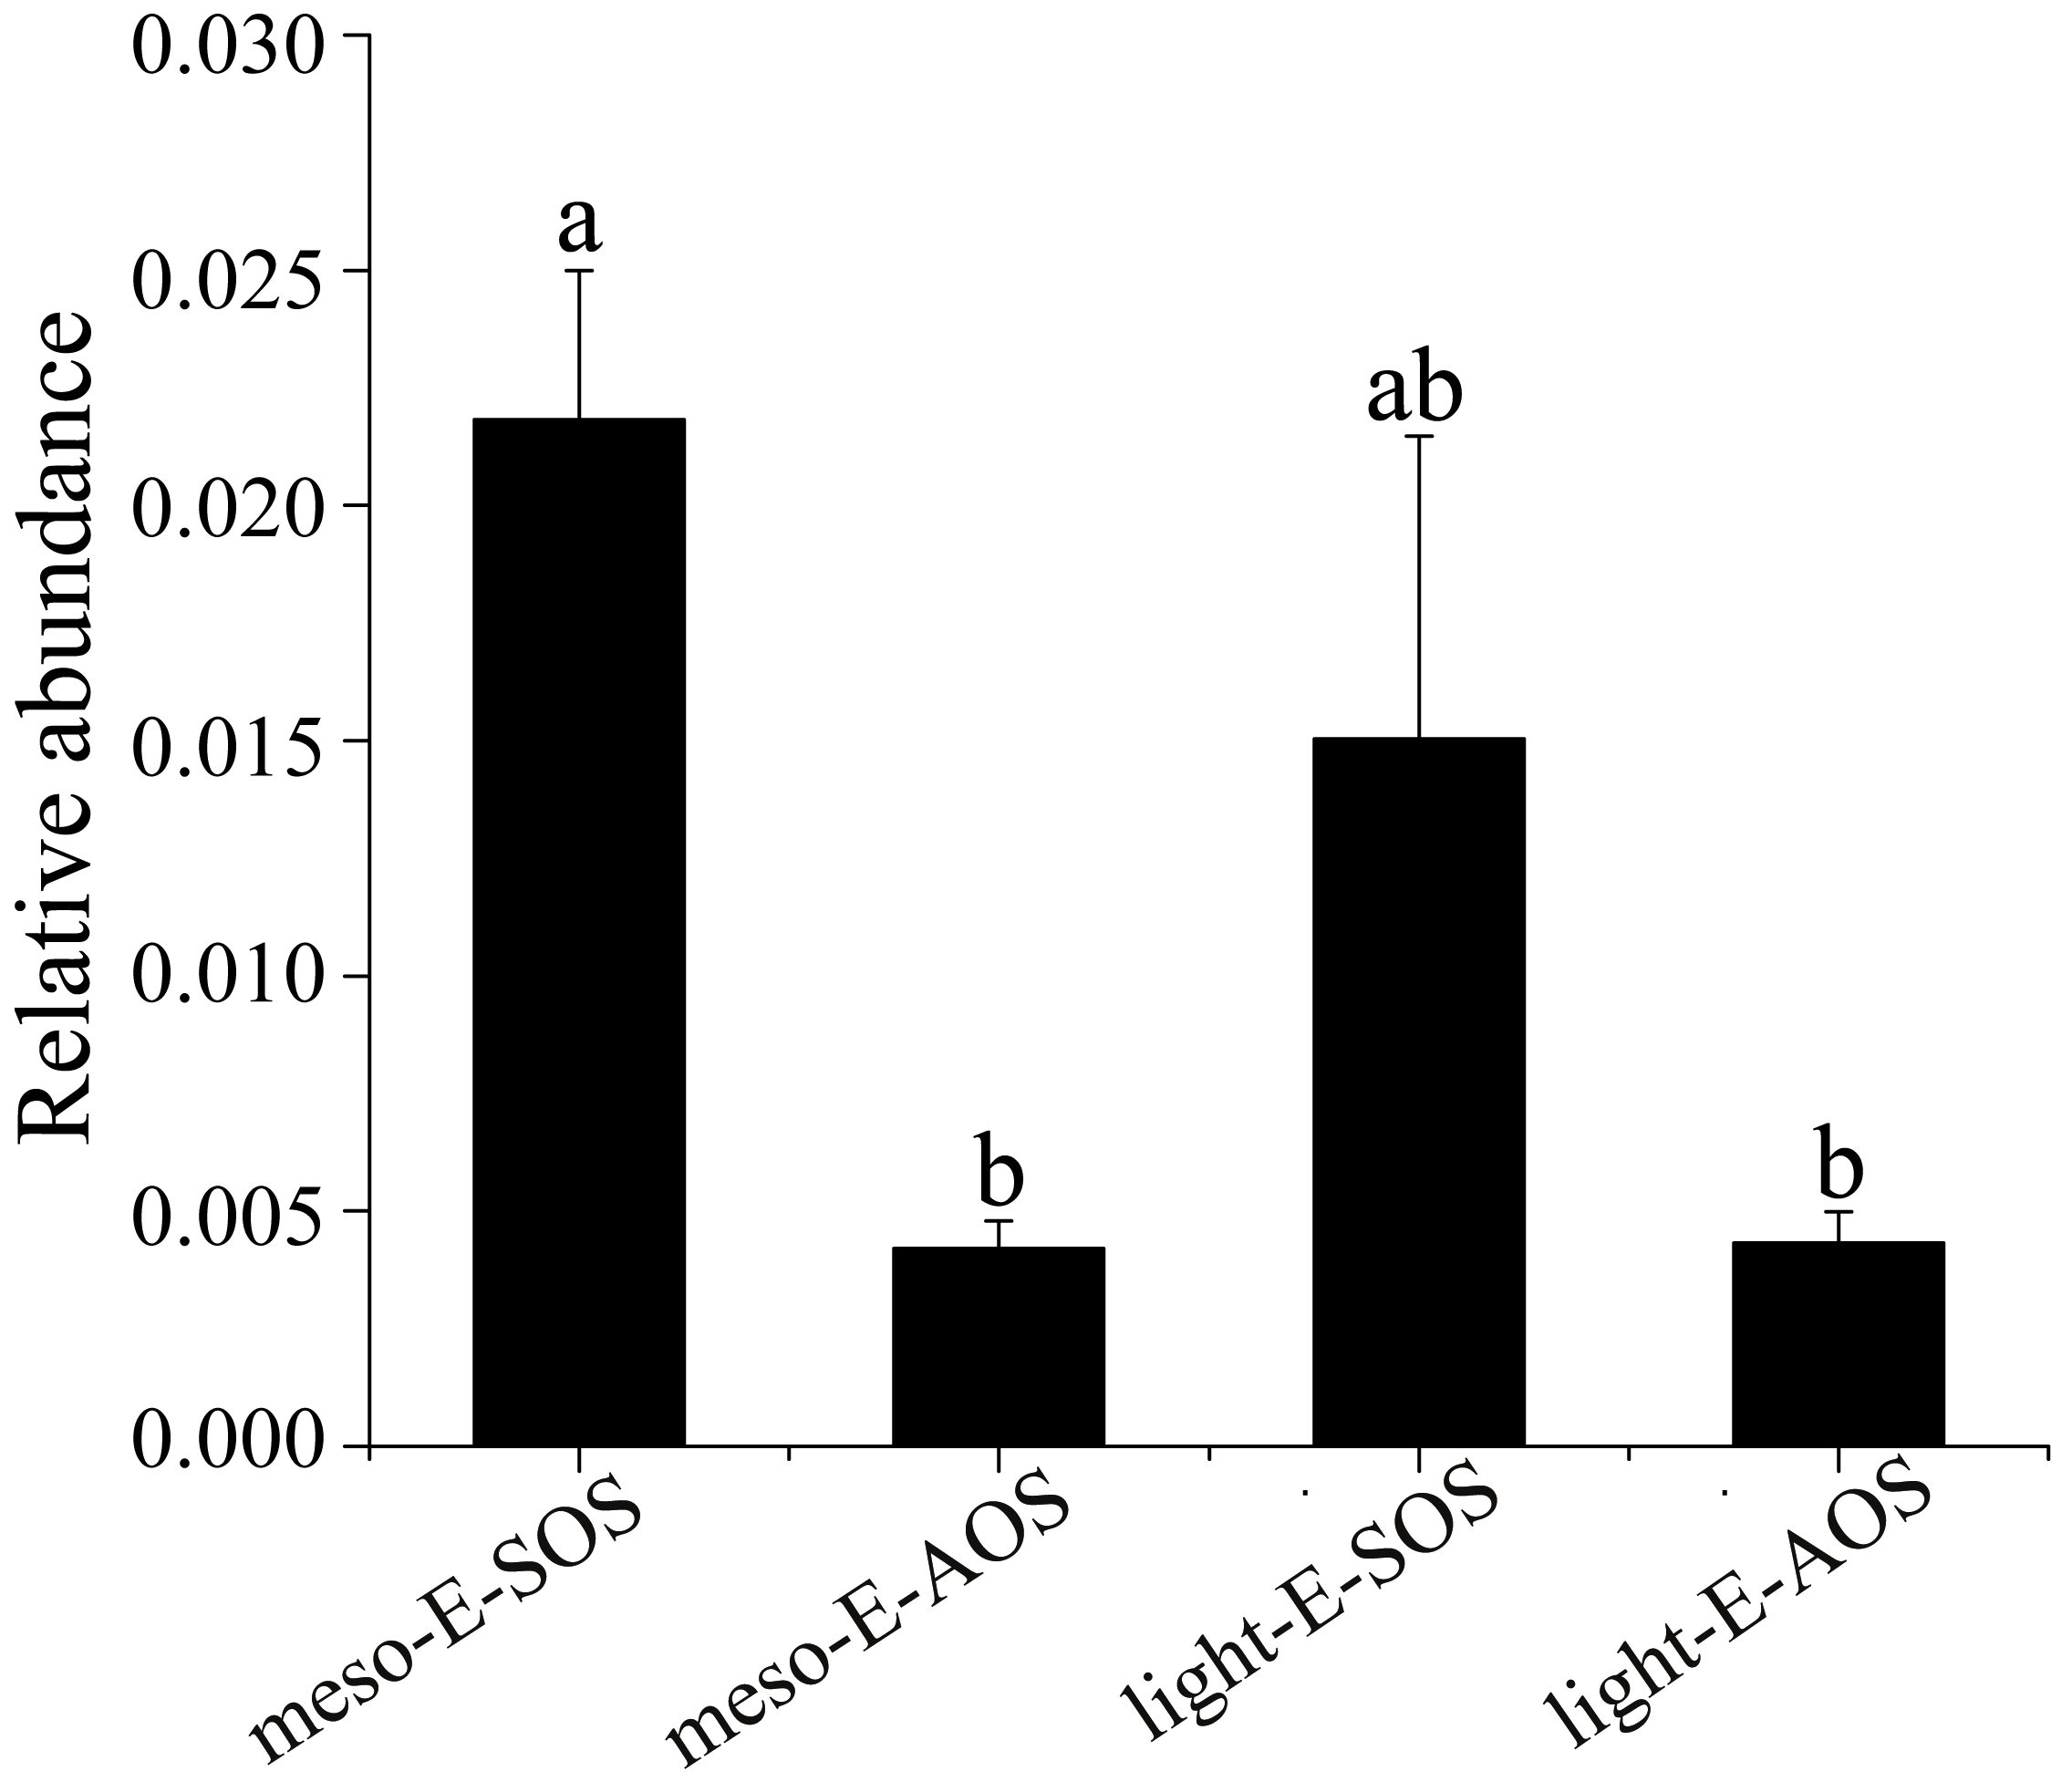


**Fig. S1** **Relative abundance of cyanobacteria-like *16S rRNA* genes in total reads in phylum level in sediments from Taihu before incubation. Meso-E-SOS and meso-E-AOS indicate the suboxic 0 to** –**2 cm layer and the anoxic** –**2 to** –**5 cm layer from Meiliang Bay, respectively. Light-E-SOS and light-E-AOS refer to the suboxic 0 to** –**2 cm layer and the anoxic** –**2 to** –**5 cm layer from central lake, respectively. Data are exihibited as Means±SD (n=3), and bars with the same lowercase letter on top were not significantly different ( *P*>0.05 ).**





**Fig. S2 Community characteristics of AOA in surface and subsurface sediment microcosms after the 8-week incubation period as revealed by 454 pyrosequencing of *amoA* genes. Neighbor-joining phylogenetic tree of the representative sequences for AOA *amoA* gene OTUs in surface sediments from Meiliang Bay (a) and central lake (b) with a similarity of more than 97% (in bold).**

**
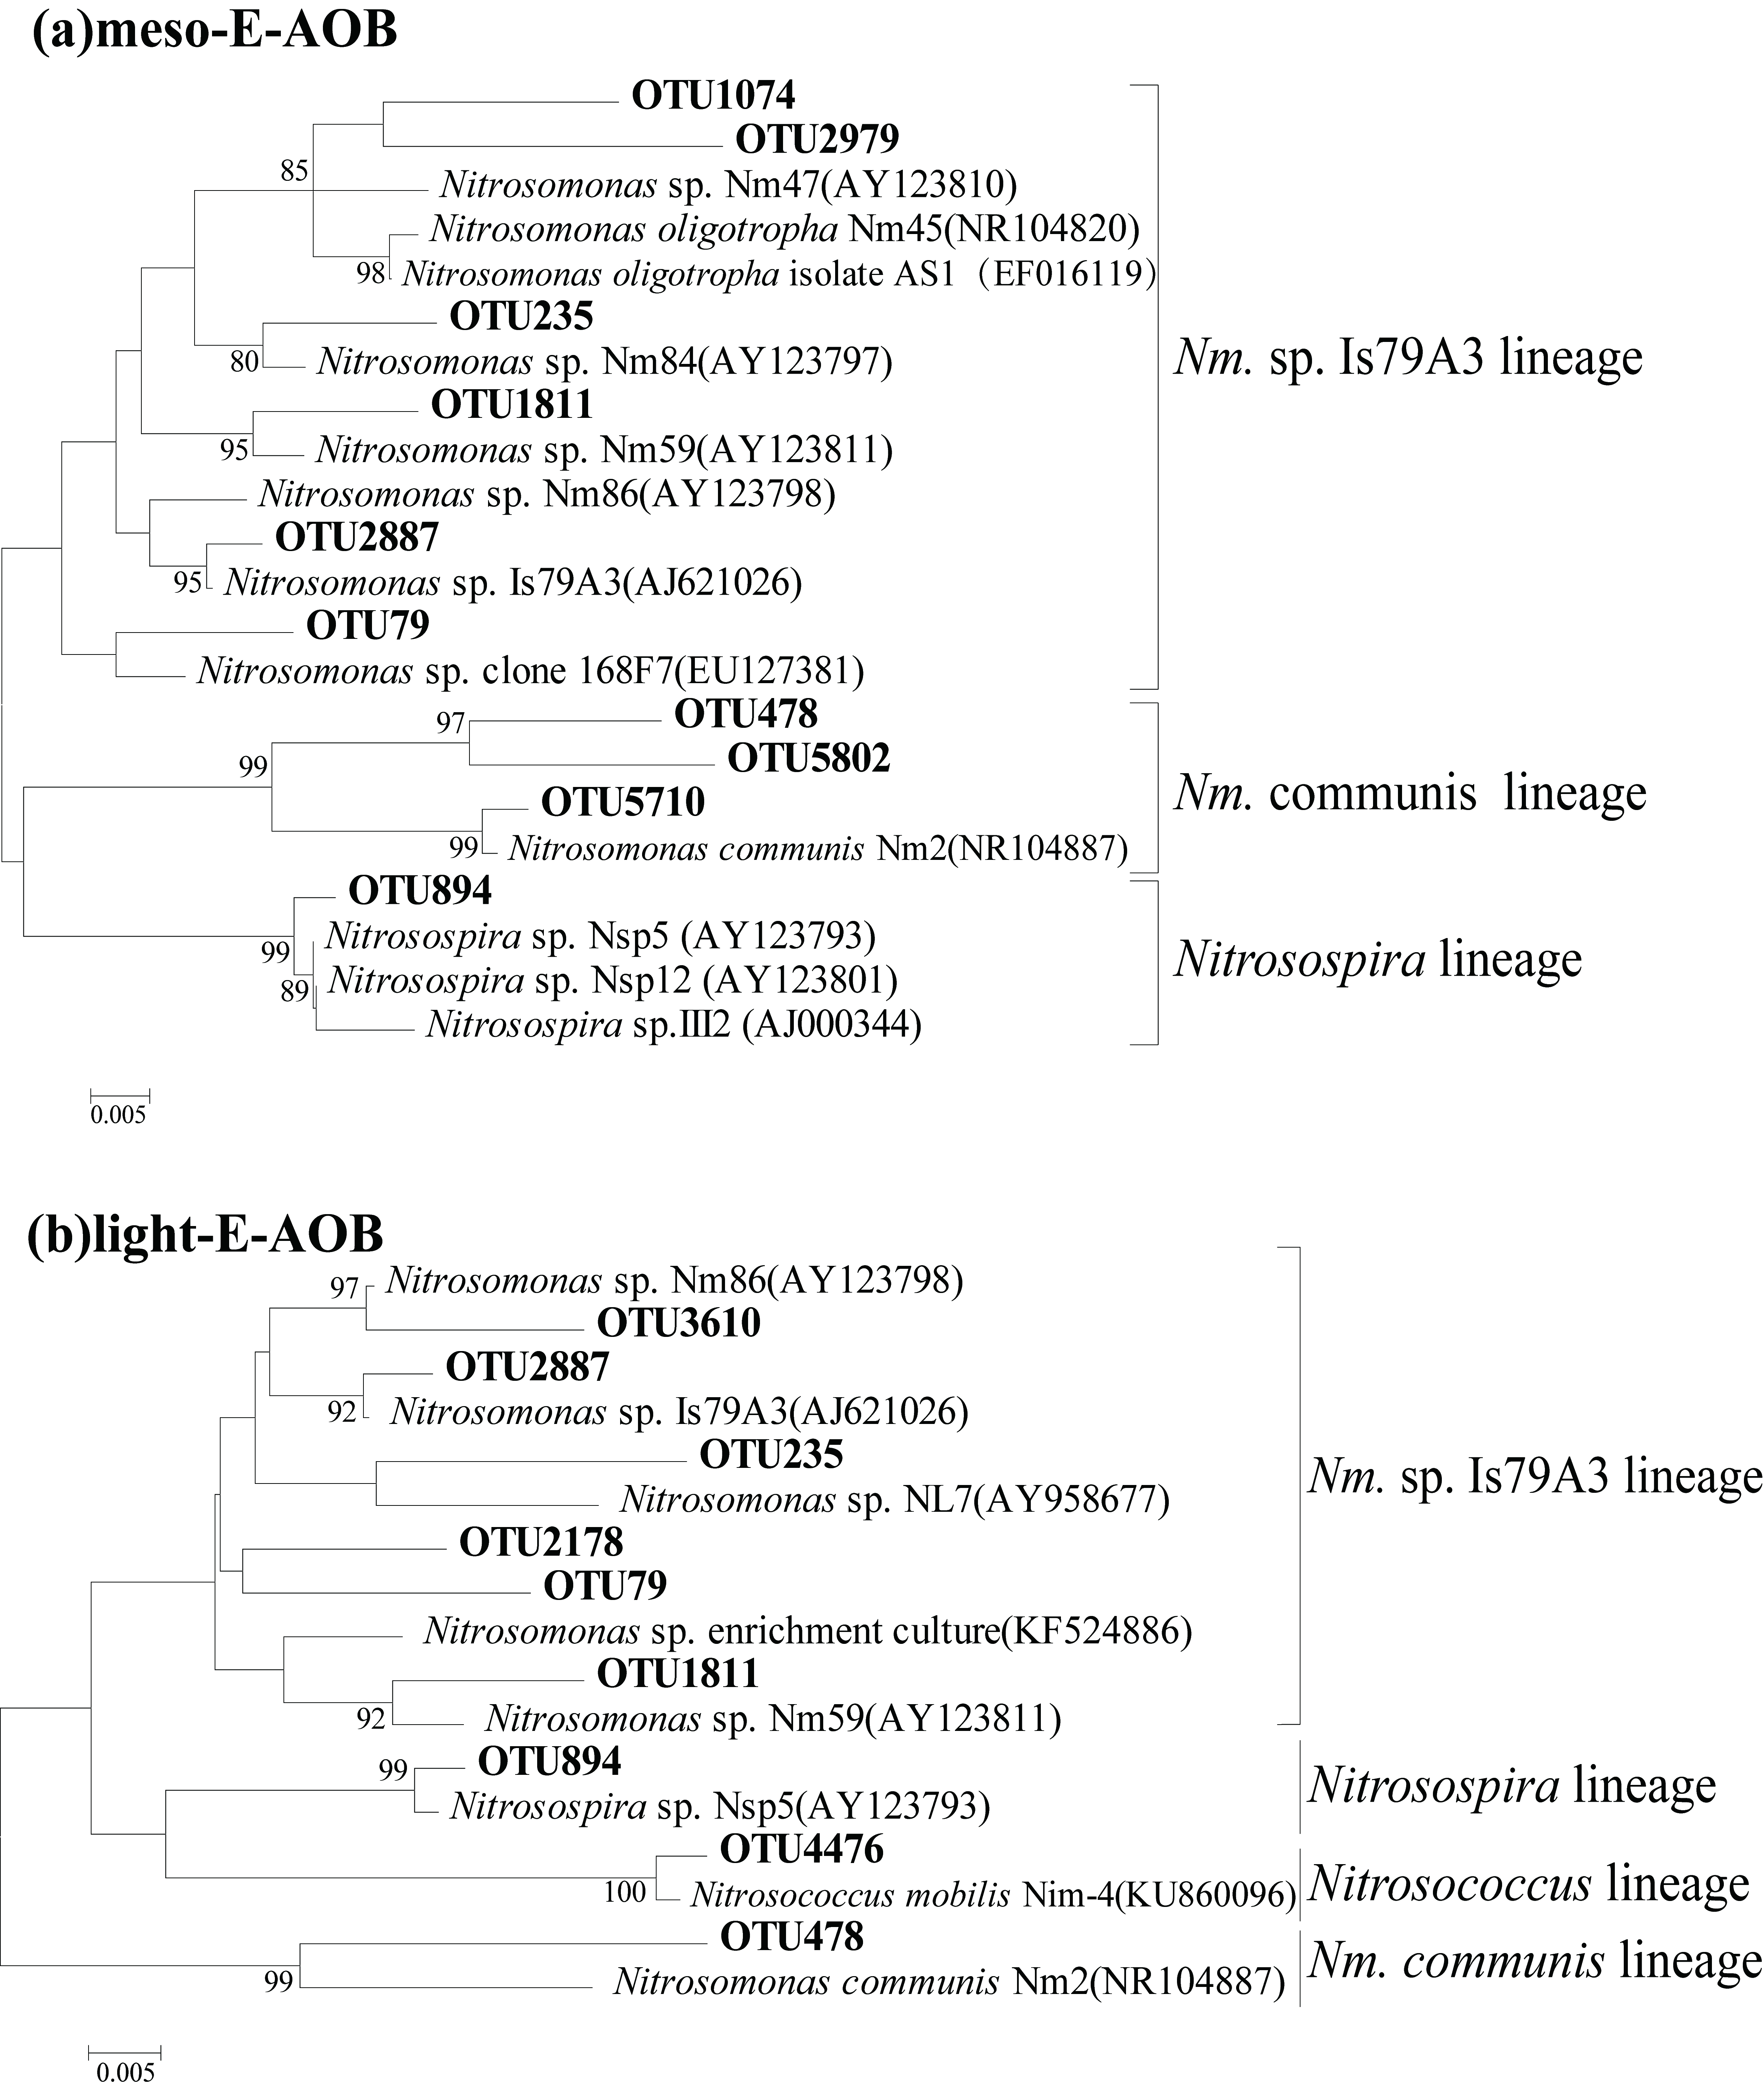
**

**Fig S3 Community characteristics of AOB in surface sediment microcosms after the 8-week incubations as revealed by *16S rRNA* genes. Neighbor-joining phylogenetic tree of the representative sequences for AOB *amoA* gene OTU in surface sediment from Meiliang Bay (a) and central lake (b) with a similarity of more than 97% (in bold).**
